# Supplementary material for: Structural parameters of palindromic repeats determine the specificity of nuclease attack of secondary structures
Source: PubMed Central journal article supplement (PMC8053094; doi:10.1093/nar/gkab168), 2021-03-27
Supplement: gkab168_supplemental_file.pdf [file gkab168_supplemental_file.pdf]

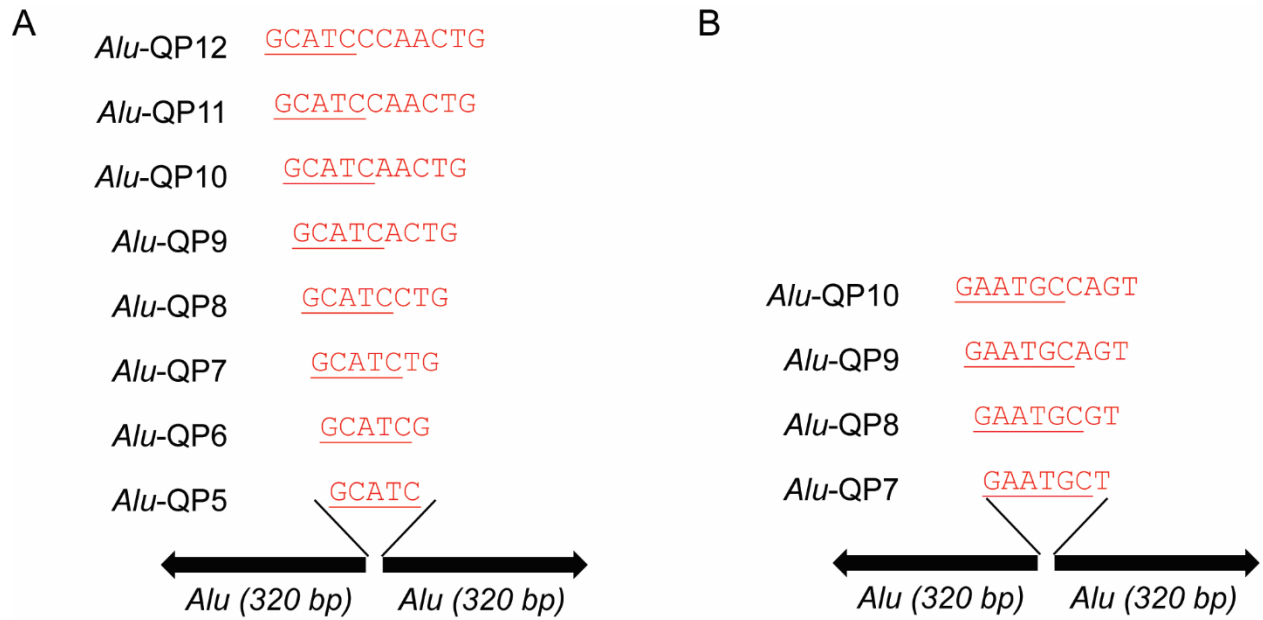

**Figure S1.** Asymmetrical spacers inserted at the center of *Alu* palindromes. Related to figure 1.

The sequence of the spacer inserted into *Alu*-PAL to create *Alu*-QP used in this study is presented in red. The spacer consists of the *Sfa*NI (A) or *Bsm*I (B) restriction site (underlined sequence) plus random nucleotides.

**A**

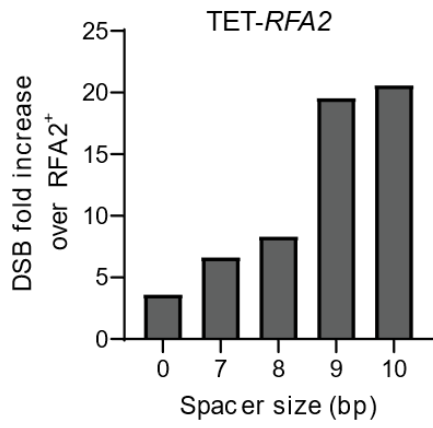

**B**

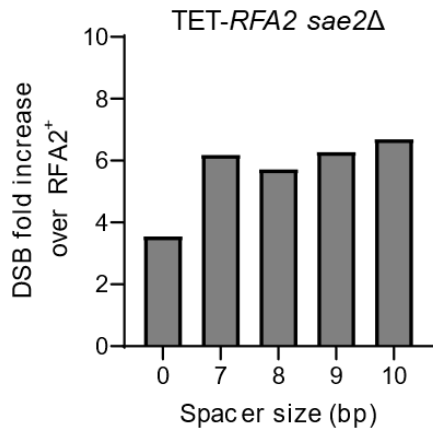

**C**

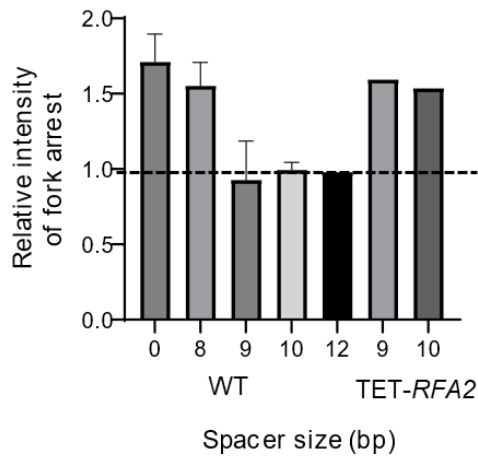

**D**

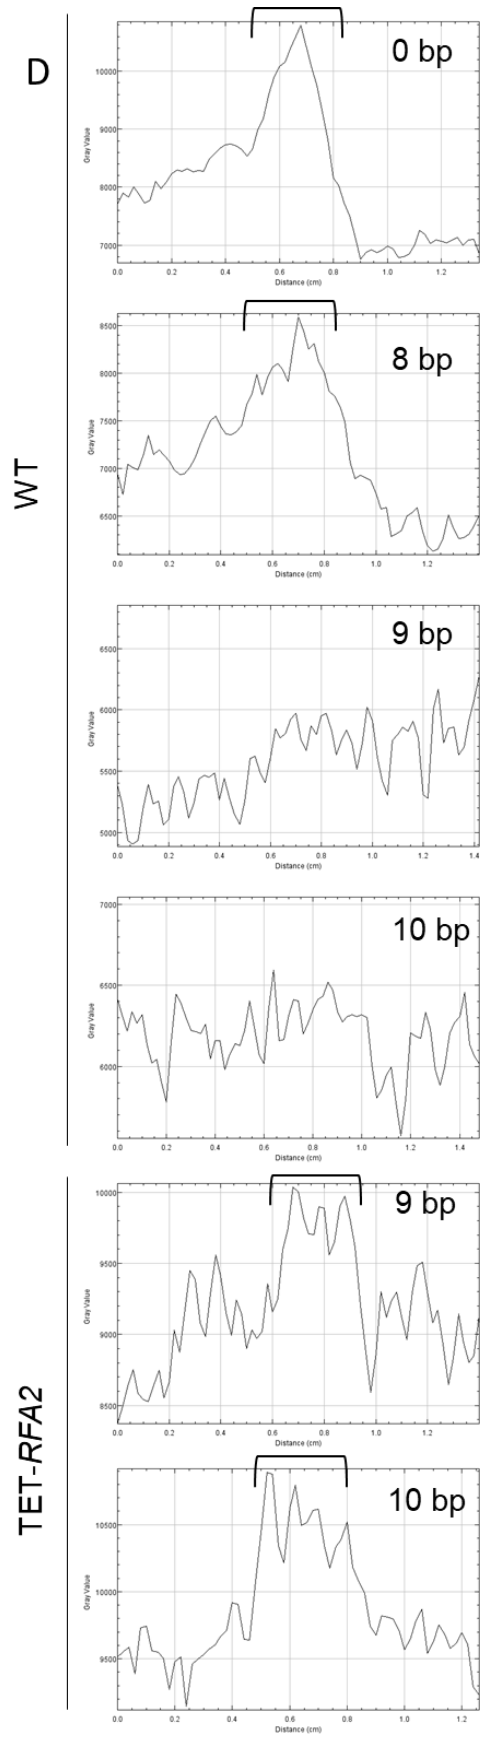

**Figure S2.** Effect of RPA downregulation on DSB formation at *Alu*-PAL and *Alu*-QP. Related to Figure 2.

A. and B. Data show the fold increase in DSB level in TET-*RFA2* relative to *RFA2*<sup>+</sup> in *WT* (A) and *sae2*Δ (B) strains. C. Quantification of the signal corresponding to site of fork arrest relative to the signal corresponding to site of unperturbed replication (downstream from the arrest). D. Densitometry analysis of the Y arc's long arm in the WT and TET-*RFA2* strains containing *Alu*-IR with indicated spacers. The presence of fork arrest is manifested as a spike in the relative signal. The bracket depicts the zone of replication arrest. Values are the mean ± standard deviation (SD).

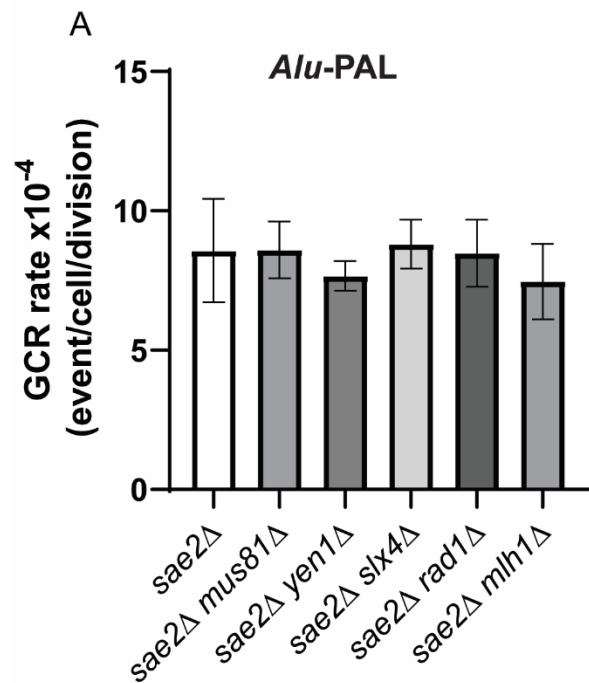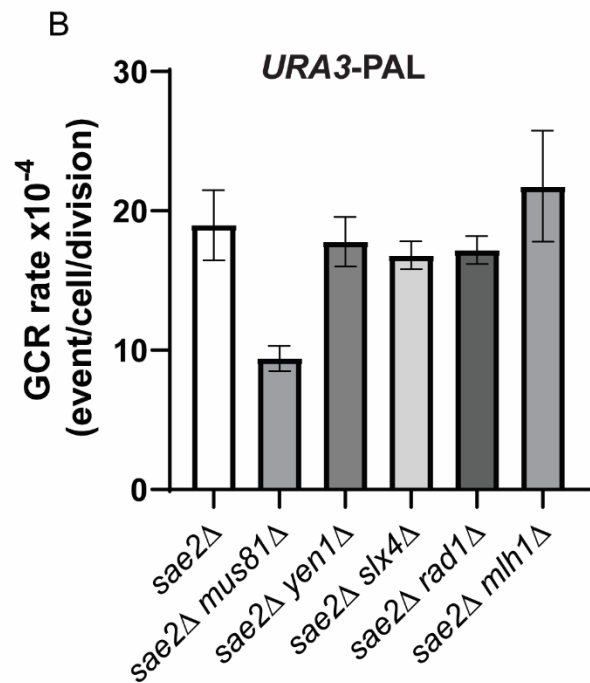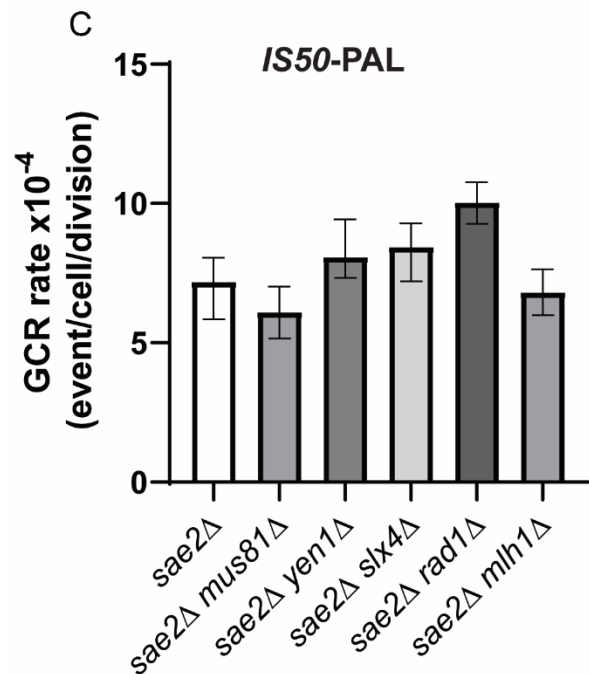

**Figure S3.** Effect of SSEs on palindromes-induced fragility. Related to Figure 3 and 4.

GCR rates were measured in *sae2* $\Delta$  strains deleted for either *MUS81*, *YEN1*, *SLX4*, *RAD1* or *MHL1*. A. GCR measurement at *Alu*-PAL. B. GCRs measurements at *URA3*-PAL. C. GCRs measurements at the transcribed palindrome *IS50*-PAL. Data are represented as the median value  $\pm$  95% confidence intervals.

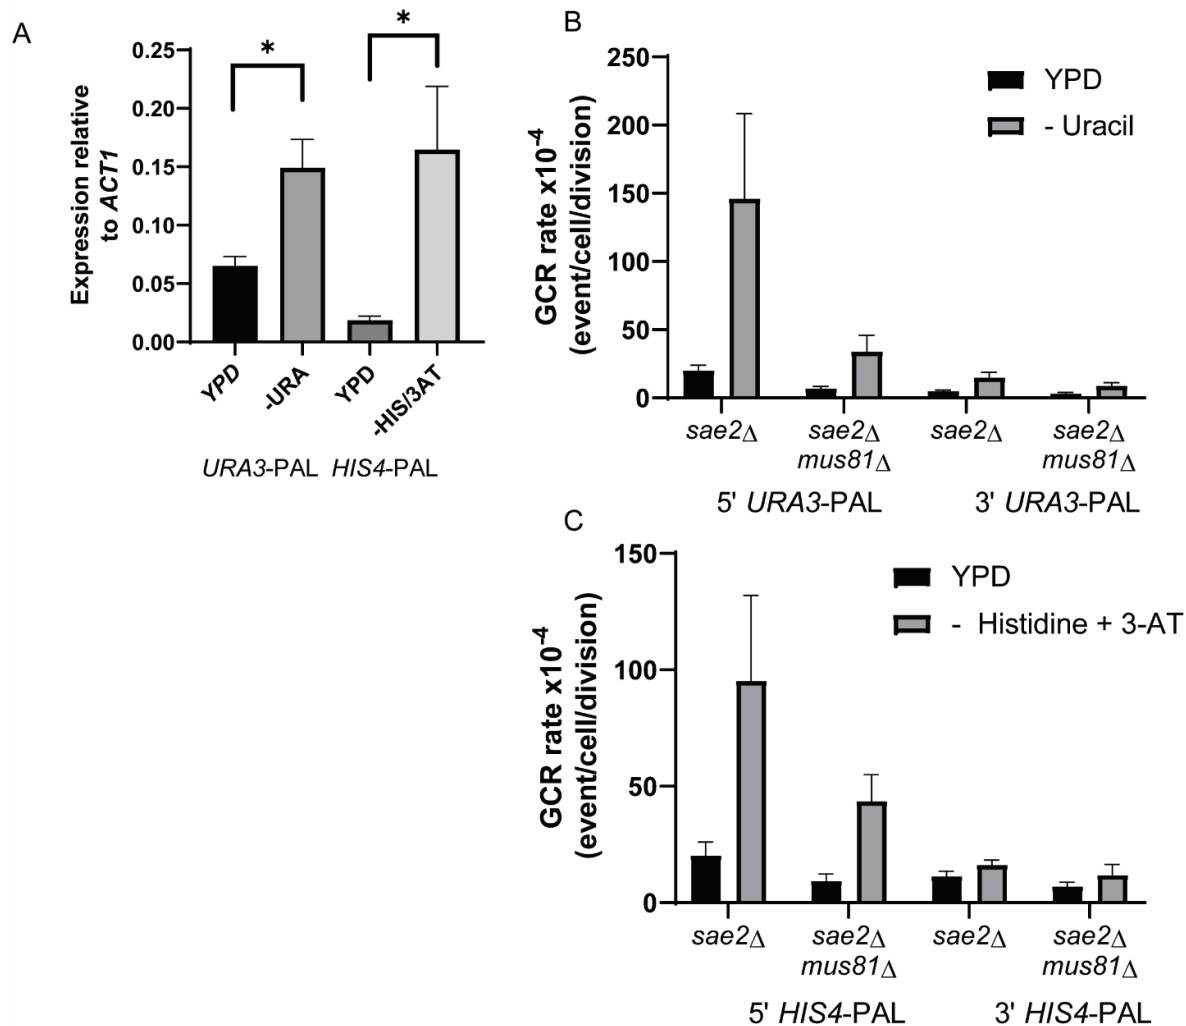

**Figure S4.** Effect Mus81 and transcription on GCRs induced at actively transcribed palindromes. Related to Figure 4.

A. Transcription level at *URA3* and *HIS4* measured by RT-qPCR. To analyze the effect of amino acid starvation on the transcription level, cells were cultured in YPD and uracil-depleted media to measure RNA transcript at *URA3-PAL*, and in YPD and histidine-depleted media supplemented with 3-AT to measure RNA transcript at *HIS4-PAL*. To determine the relative abundance, mRNA levels were normalized to *ACT1* and compared to the YPD control. To limit the impact of DSB formation and resection on the expression level of *URA3* and *HIS4*, the *sae2Δ mus81Δ* strain, in which the DSB level is minimal, was used. Data are the mean of at least 3 values  $\pm$  standard deviation. Significance was estimated by two sample *t* tests. \* $p < 0.004$ . B. GCR rates at 5' and 3' *URA3-PAL* in *sae2Δ* and *sae2Δ mus81Δ* in presence and absence of uracil in the growth media. C. GCR rates at 5' and 3' *HIS4-PAL* in *sae2Δ* and *sae2Δ mus81Δ* in presence of histidine or in media lacking histidine and supplemented with 3-AT. Data in B and C are represented as the median value  $\pm$  95% confidence intervals.

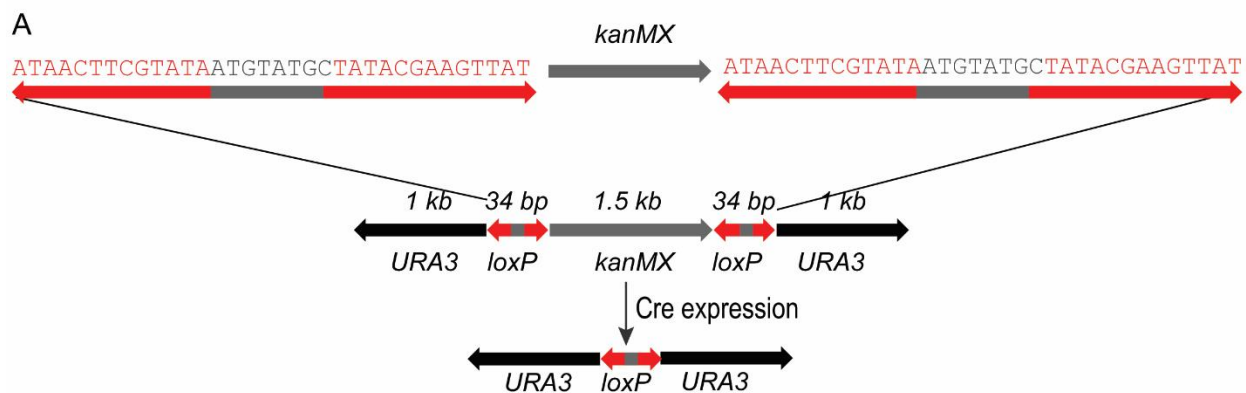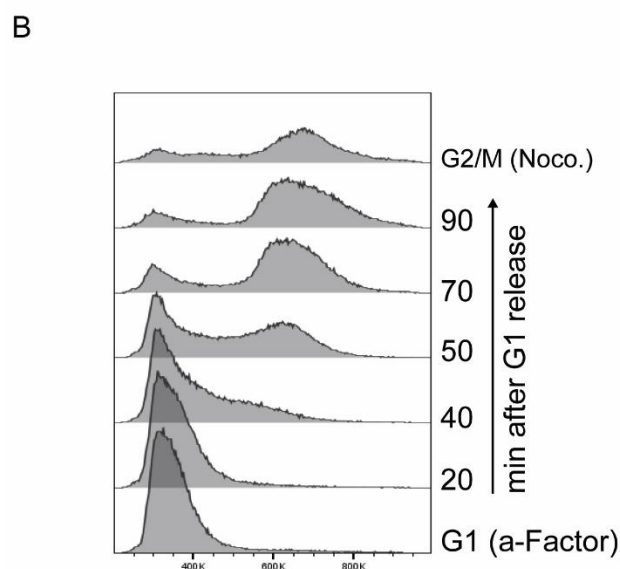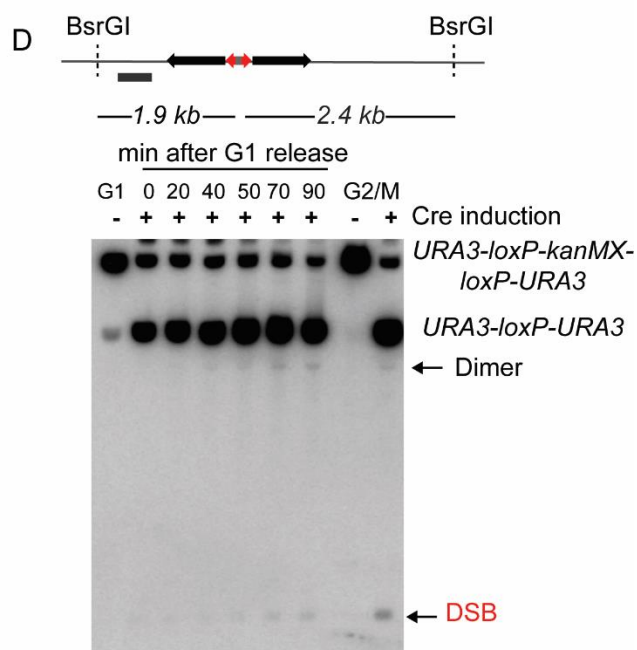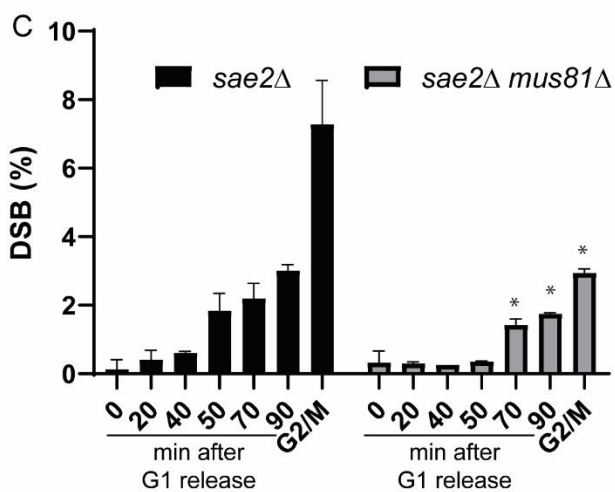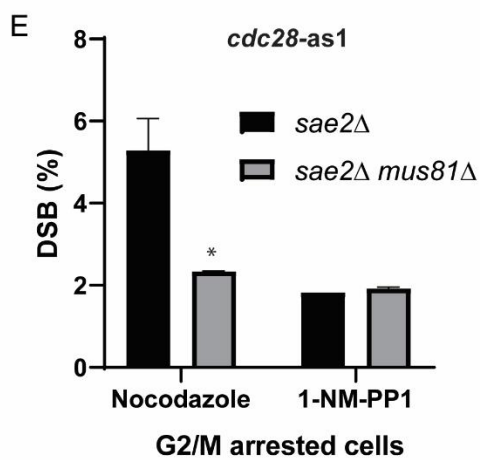

**Figure S5.** Conditional *URA3*-quasi palindrome to study DSB formation through the cell cycle. Related to Figure 5.

A. Diagram of the conditional *URA3*-QP system showing the *loxP* sequence. B. Representative diagram of DNA content analysis by FACS in G1 and G2/M arrested cells. Cells harboring the conditional *URA3*-QP were synchronized in G1 with alpha-factor. After Cre expression induction, cells were released into S phase. Progression through the cell cycle was analyzed at the same time points (minutes after G1 release) at which DSB analysis was performed. Cells were synchronized in G2/M with nocodazole. C. Quantification of DSBs in *sae2Δ* and *sae2Δ mus81Δ* presented in figure 5B. Timepoints after G1 release are indicated. G2/M corresponds to nocodazole arrested cells. Values are the mean  $\pm$  standard deviation (SD). Significance was estimated by *t* test. \*  $p < 0.05$ . D. Representative analysis of telomere-proximal DSB formation during the cell cycle in *sae2Δ*. Detection was carried out as described in Figure 5A-B. Genomic DNA embedded in agarose plugs was digested with *BsrGI*. The position of the resulting quasi-palindrome (*URA3-loxP-URA3*) relative to the *BsrGI* restriction site is represented. Southern hybridization was performed using a *LYS2*-specific probe located on the telomere-proximal side of the IR (black triangle) and revealed four different fragments. (i) a 5.8 kb fragment corresponding to the unbroken chromosome V containing the intact *URA3-loxP-kanMX-loxP-URA3*. This fragment is predominant when Cre is not expressed (Cre induction -). (ii) a 4.3 kb fragment corresponding to the unbroken chromosome V containing the *URA3-loxP-URA3* quasi-palindrome. This fragment becomes predominant upon Cre expression (Cre induction +). (iii) a 3.8 kb fragment corresponding to the dimer and (vi) a 1.9 kb fragment corresponding the break. E. Quantification of DSBs in *cdc28-as1 sae2Δ* and *cdc28-as1 sae2Δ mus81Δ* presented in figure 5C. Cells were arrested in G2/M with nocodazole or 1-NM-PP1. Values are the mean  $\pm$  standard deviation (SD). Significance was estimated by *t* test. \*  $p < 0.05$ .

**Table S1.** *Alu*-IR spacer length determines GCR rate

| <i>Alu</i> -IR   | GCR rate ( $\times 10^{-7}$ ) |                      |
|------------------|-------------------------------|----------------------|
|                  | WT                            | <i>sae2</i> $\Delta$ |
| <i>Alu</i> -PAL  | 7000 (5017-9943) <sup>a</sup> | 7829 (6560-9459)     |
| <i>Alu</i> -QP5  | 6375 (4549-8924)              | ND <sup>b</sup>      |
| <i>Alu</i> -QP6  | 7015 (4984-7732)              | ND                   |
| <i>Alu</i> -QP7  | 4449 (2853-5390)              | 5549 (2993-5699)     |
| <i>Alu</i> -QP8  | 3606 (4784-6584)              | 4603 (4062-5529)     |
| <i>Alu</i> -QP9  | 1670 (1032-4064)              | 2141 (1660-2722)     |
| <i>Alu</i> -QP10 | 577 (448-806)                 | 2072 (1506-2746)     |
| <i>Alu</i> -QP11 | 603 (256-1116)                | 1830 (1506-2010)     |

<sup>a</sup> Numbers in parenthesis correspond to the 95% confidence interval.

<sup>b</sup> Not determined.

**Table S2.** Effect of palindromic sequences on GCRs is not sequence dependent

| <i>Alu</i> -IR (BsmI spacer) | GCR rate ( $\times 10^{-7}$ ) |                      |
|------------------------------|-------------------------------|----------------------|
|                              | WT                            | <i>sae2</i> $\Delta$ |
| <i>Alu</i> -QP8              | 2860 (2421-3358) <sup>a</sup> | 3951 (2992-4346)     |
| <i>Alu</i> -QP9              | 1974 (1561-2990)              | 3893 (3451-5490)     |
| <i>Alu</i> -QP10             | 1095 (944-1520)               | 3288 (2520-3632)     |

<sup>a</sup> Numbers in parenthesis correspond to the 95% confidence interval.



**Table S3.** Strains used in this study

| <b>Strain number</b> | <b>Genotype*</b>                                             | <b>IR as referred to in the text</b> |
|----------------------|--------------------------------------------------------------|--------------------------------------|
| <b>KT849</b>         | <i>lys2::Alu-core</i>                                        |                                      |
| <b>YKL719</b>        | <i>lys2::Alu-SwaI</i>                                        | Alu-PAL                              |
| <b>YKL3210</b>       | <i>lys2::Alu-SfaI-12bp</i>                                   | Alu-QP12                             |
| <b>YKL3243</b>       | <i>lys2::Alu-SfaI-11bp</i>                                   | Alu-QP11                             |
| <b>YKL3241</b>       | <i>lys2::Alu-SfaI-10bp</i>                                   | Alu-QP10                             |
| <b>YKL3361</b>       | <i>lys2::Alu-SfaI-9bp</i>                                    | Alu-QP9                              |
| <b>YKL3209</b>       | <i>lys2::Alu-SfaI-8bp</i>                                    | Alu-QP8                              |
| <b>YKL3206</b>       | <i>lys2::Alu-SfaI-7bp</i>                                    | Alu-QP7                              |
| <b>YKL3238</b>       | <i>lys2::Alu-SfaI-6bp</i>                                    | Alu-QP6                              |
| <b>YKL3304</b>       | <i>lys2::Alu-SfaI-5bp</i>                                    | Alu-QP5                              |
| <b>YKL4074</b>       | <i>lys2::Alu-BsmI-10bp</i>                                   | Alu-QP10                             |
| <b>YKL4070</b>       | <i>lys2::Alu-BsmI-9bp</i>                                    | Alu-QP9                              |
| <b>YKL4066</b>       | <i>lys2::Alu-BsmI-8bp</i>                                    | Alu-QP8                              |
| <b>YKL4062</b>       | <i>lys2::Alu-BsmI-7bp</i>                                    | Alu-QP7                              |
| <b>YKL733</b>        | <i>lys2::Alu-SwaI Δsae2</i>                                  | Alu-PAL                              |
| <b>YKL3290</b>       | <i>lys2::Alu-SfaI-12bp sae2::hphMX</i>                       | Alu-QP12                             |
| <b>YKL3288</b>       | <i>lys2::Alu-SfaI-11bp sae2::hphMX</i>                       | Alu-QP11                             |
| <b>YKL3286</b>       | <i>lys2::Alu-SfaI-10bp sae2::hphMX</i>                       | Alu-QP10                             |
| <b>YKL3364</b>       | <i>lys2::Alu-SfaI-9bp sae2::hphMX</i>                        | Alu-QP9                              |
| <b>YKL3282</b>       | <i>lys2::Alu-SfaI-8bp sae2::hphMX</i>                        | Alu-QP8                              |
| <b>YKL3987</b>       | <i>lys2::Alu-SfaI-7bp sae2::hphMX</i>                        | Alu-QP7                              |
| <b>YKL4090</b>       | <i>lys2::Alu-BsmI-10bp sae2::hphMX</i>                       | Alu-QP10                             |
| <b>YKL4086</b>       | <i>lys2::Alu-BsmI-9bp sae2::hphMX</i>                        | Alu-QP9                              |
| <b>YKL4082</b>       | <i>lys2::Alu-BsmI-8bp sae2::hphMX</i>                        | Alu-QP8                              |
| <b>YKL4078</b>       | <i>lys2::Alu-BsmI-7bp sae2::hphMX</i>                        | Alu-QP7                              |
| <b>YKL3994</b>       | <i>lys2::Alu-SwaI rfa2::TET-RFA2:kanMX4</i>                  | Alu-PAL                              |
| <b>YKL4022</b>       | <i>lys2::Alu-SfaI-11bp rfa2::TET-RFA2:kanMX4</i>             | Alu-QP11                             |
| <b>YKL4018</b>       | <i>lys2::Alu-SfaI-10bp rfa2::TET-RFA2:kanMX4</i>             | Alu-QP10                             |
| <b>YKL4014</b>       | <i>lys2::Alu-SfaI-9bp rfa2::TET-RFA2:kanMX4</i>              | Alu-QP9                              |
| <b>YKL4010</b>       | <i>lys2::Alu-SfaI-8bp rfa2::TET-RFA2:kanMX4</i>              | Alu-QP8                              |
| <b>YKL4006</b>       | <i>lys2::Alu-SfaI-7bp rfa2::TET-RFA2:kanMX4</i>              | Alu-QP7                              |
| <b>YKL4026</b>       | <i>lys2::Alu-PAL sae2::hphMX rfa2::TET-RFA2:kanMX4</i>       | Alu-PAL                              |
| <b>YKL4058</b>       | <i>lys2::Alu-SfaI-12bp sae2::hphMX rfa2::TET-RFA2:kanMX4</i> | Alu-QP12                             |
| <b>YKL4054</b>       | <i>lys2::Alu-SfaI-11bp sae2::hphMX rfa2::TET-RFA2:kanMX4</i> | Alu-QP11                             |
| <b>YKL4050</b>       | <i>lys2::Alu-SfaI-10bp sae2::hphMX rfa2::TET-RFA2:kanMX4</i> | Alu-QP10                             |
| <b>YKL4046</b>       | <i>lys2::Alu-SfaI-9bp sae2::hphMX rfa2::TET-RFA2:kanMX4</i>  | Alu-QP9                              |

|                |                                                                                                         |                        |
|----------------|---------------------------------------------------------------------------------------------------------|------------------------|
| <b>YKL4042</b> | <i>lys2::Alu-SfanI-8bp sae2::hphMX rfa2::TET-RFA2:kanMX4</i>                                            | Alu-QP8                |
| <b>YKL4038</b> | <i>lys2::Alu-SfanI-7bp sae2::hphMX rfa2::TET-RFA2:kanMX4</i>                                            | Alu-QP7                |
| <b>YKL1261</b> | <i>lys2::Alu-SwaI mre11::kanMX4</i>                                                                     | Alu-PAL                |
| <b>YKL1369</b> | <i>lys2::Alu-SwaI sae2::hphMX mus81::kanMX4</i>                                                         | Alu-PAL                |
| <b>YKL2610</b> | <i>lys2::Alu-SwaI sae2::hphMX yen1::kanMX4</i>                                                          | Alu-PAL                |
| <b>YKL1395</b> | <i>lys2::Alu-SwaI sae2::hphMX slx4::natMX</i>                                                           | Alu-PAL                |
| <b>KT1255</b>  | <i>lys2::Alu-SwaI sae2::TRP1 rad1::kanMX</i>                                                            | Alu-PAL                |
| <b>YKL2607</b> | <i>lys2::Alu-SwaI sae2::hphMX mlh1::URA3</i>                                                            | Alu-PAL                |
| <b>YKL854</b>  | <i>lys2::IS50-PAL</i>                                                                                   | IS50-PAL               |
| <b>YKL918</b>  | <i>lys2::IS50-PAL sae2::TRP1</i>                                                                        | IS50-PAL               |
| <b>YKL2613</b> | <i>lys2::IS50-PAL sae2::TRP1 mus81::kanMX4</i>                                                          | IS50-PAL               |
| <b>YKL2619</b> | <i>lys2::IS50-PAL sae2::TRP1 yen1::kanMX4</i>                                                           | IS50-PAL               |
| <b>YKL2629</b> | <i>lys2::IS50-PAL sae2::TRP1 slx4::natMX</i>                                                            | IS50-PAL               |
| <b>KT1259</b>  | <i>lys2::IS50-PAL sae2::TRP1 rad1::kanMX</i>                                                            | IS50-PAL               |
| <b>YKL2616</b> | <i>lys2::IS50-PAL sae2::TRP1 mlh1::URA3</i>                                                             | IS50-PAL               |
| <b>YKL776</b>  | <i>lys2::5'URA3-PAL</i>                                                                                 | URA3-PAL               |
| <b>YKL936</b>  | <i>lys2::5'URA3-PAL sae2::TRP1</i>                                                                      | URA3-PAL               |
| <b>YKL1229</b> | <i>lys2::5'URA3-PAL sae2::TRP1 mus81::kanMX4</i>                                                        | URA3-PAL               |
| <b>YKL2663</b> | <i>lys2::5'URA3-PAL sae2::TRP1 yen1::kanMX4</i>                                                         | URA3-PAL               |
| <b>YKL1360</b> | <i>lys2::5'URA3-PAL sae2::TRP1 slx4::natMX</i>                                                          | URA3-PAL               |
| <b>KT1263</b>  | <i>lys2::5'URA3-PAL-SwaI sae2::hphMX rad1::kanMX</i>                                                    | URA3-PAL               |
| <b>YKL2650</b> | <i>lys2::5'URA3-PAL-SwaI sae2::TRP1 mlh1::URA3</i>                                                      | URA3-PAL               |
| <b>KT905</b>   | <i>lys2::3'URA3-PAL sae2::TRP1</i>                                                                      | 3'URA3-PAL             |
| <b>KT917</b>   | <i>lys2::3'URA3-PAL sae2::TRP1 mus81::natMX</i>                                                         | 3'URA3-PAL             |
| <b>YKL2869</b> | <i>lys2::5'HIS4-PAL sae2::TRP1 his4::natMX</i>                                                          | 5'HIS4-PAL             |
| <b>KT925</b>   | <i>lys2::5'HIS4-PAL sae2::TRP1 mus81::kanMX4 his4::natMX</i>                                            | 5'HIS4-PAL             |
| <b>KT1218</b>  | <i>lys2::3'HIS4-PAL sae2::hphMX his4::natMX</i>                                                         | 3'HIS4-PAL             |
| <b>KT1224</b>  | <i>lys2::3'HIS4-PAL sae2::hphMX mus81::kanMX4 his4::natMX</i>                                           | 3'HIS4-PAL             |
| <b>YKL1024</b> | <i>lys2::URA3-loxP-kanMX-loxP-URA3 sae2::TRP1 leu2-3,112::GAL-Cre-EBD</i>                               | Conditional<br>URA3-QP |
| <b>YKL1053</b> | <i>lys2::URA3-loxP-kanMX-loxP-URA3 sae2::TRP1 mus81::natMX leu2-3,112::GAL-Cre-EBD</i>                  | Conditional<br>URA3-QP |
| <b>YKL1109</b> | <i>lys2::URA3-loxP-kanMX-loxP-URA3 sae2::TRP1 leu2-3,112::GAL-Cre-EBD cdc28::cdc28-as1</i>              | Conditional<br>URA3-QP |
| <b>KT1383</b>  | <i>lys2::URA3-loxP-kanMX-loxP-URA3 sae2::TRP1 mus81::kanMX leu2-3,112::GAL-Cre-EBD cdc28::cdc28-as1</i> | Conditional<br>URA3-QP |

\* All the strains share the same genetic background: *MAT $\alpha$  bar1 $\Delta$  his7-2 trp1 $\Delta$  ura3 $\Delta$  leu2-3,112 ade2 $\Delta$  lys2 $\Delta$  cup1 $\Delta$  yhr054c $\Delta$  cup2 $\Delta$  V34205::ADE2lys2::IR V29616::CUP1*.

**Table S4.** Primers used in this study

| Name           | Sequence                                                                                               | Purpose                                                                                               |
|----------------|--------------------------------------------------------------------------------------------------------|-------------------------------------------------------------------------------------------------------|
| ku-alu51       | CCTCGGCCTCCCAAAGTGCTGGGATTACAGGCGTGAGCCACCGCGCCCGGCCGAGCTCGTTTTCGACACTGG                               | To insert CORE between Alu-IRs                                                                        |
| ku-alu-31      | CCTCCCAAAGTGCTGGGATTACAGGCGTGAGCCACC GCGCCCGGCCTCCTTACCATTAAGTTGATC                                    |                                                                                                       |
| Alu-SwaI       | GCTGGGATTACAGGCGTGAGCCACCGCGCCCGGCCA <b>TTAAAT</b> GGCCGGGCGCGGTGGCTCACGCCTGTAATC CCAGCA               | To replace core with the spacer (blue sequence for perfect palindrome and red for quasi-palindromes ) |
| Alu-SfaNI-12bp | AAAGTGCTGGGATTACAGGCGTGAGCCACCGCGCCC GGCC <b>GCATCCCACTG</b> GGCCGGGCGCGGTGGCTCAC GCCTGTAATCCCAGCACTTT |                                                                                                       |
| Alu-SfaNI-11bp | AAAGTGCTGGGATTACAGGCGTGAGCCACCGCGCCC GGCC <b>GCATCCAACTG</b> GGCCGGGCGCGGTGGCTCACG CCTGTAATCCCAGCACTTT |                                                                                                       |
| Alu-SfaNI-10bp | AAAGTGCTGGGATTACAGGCGTGAGCCACCGCGCCC GGCC <b>GCATCAACTG</b> GGCCGGGCGCGGTGGCTCACGC CTGTAATCCCAGCACTTT  |                                                                                                       |
| Alu-SfaNI-9bp  | AAAGTGCTGGGATTACAGGCGTGAGCCACCGCGCCC GGCC <b>GCATCACTG</b> GGCCGGGCGCGGTGGCTCACGCC TGTAATCCCAGCACTTT   |                                                                                                       |
| Alu-SfaNI-8bp  | AAAGTGCTGGGATTACAGGCGTGAGCCACCGCGCCC GGCC <b>GCATCCTG</b> GGCCGGGCGCGGTGGCTCACGCCT GTAATCCCAGCACTTT    |                                                                                                       |
| Alu-SfaNI-7bp  | AAAGTGCTGGGATTACAGGCGTGAGCCACCGCGCCC GGCC <b>GCATCTG</b> GGCCGGGCGCGGTGGCTCACGCCTGT AATCCCAGCACTTT     |                                                                                                       |
| Alu-SfaNI-6bp  | AAAGTGCTGGGATTACAGGCGTGAGCCACCGCGCCC GGCC <b>GCATCG</b> GGCCGGGCGCGGTGGCTCACGCCTGT AATCCCAGCACTTT      |                                                                                                       |
| Alu-SfaNI-5bp  | AAAGTGCTGGGATTACAGGCGTGAGCCACCGCGCCC GGCC <b>GCATC</b> GGCCGGGCGCGGTGGCTCACGCCTGTA ATCCCAGCACTTT       |                                                                                                       |
| Alu-BsmI-10bp  | AAAGTGCTGGGATTACAGGCGTGAGCCACCGCGCCC GGCC <b>GAATGCCAGT</b> GGCCGGGCGCGGTGGCTCACGC CTGTAATCCCAGCACTTT  |                                                                                                       |
| Alu-BsmI-9bp   | AAAGTGCTGGGATTACAGGCGTGAGCCACCGCGCCC GGCC <b>GAATGCAGT</b> GGCCGGGCGCGGTGGCTCACGCC TGTAATCCCAGCACTTT   |                                                                                                       |
| Alu-BsmI-8bp   | AAAGTGCTGGGATTACAGGCGTGAGCCACCGCGCCC GGCC <b>GAATGCGT</b> GGCCGGGCGCGGTGGCTCACGCCT GTAATCCCAGCACTTT    |                                                                                                       |
| Alu-BsmI-7bp   | AAAGTGCTGGGATTACAGGCGTGAGCCACCGCGCCC GGCC <b>GAATGCT</b> GGCCGGGCGCGGTGGCTCACGCCTG TAATCCCAGCACTTT     |                                                                                                       |

|           |                               |                                      |
|-----------|-------------------------------|--------------------------------------|
| S2870     | CTGACGACTCTCAGTTTACCAATGT     | Telomere proximal probe for Alu-PAL  |
| O3138     | GAGAGGGGTACGAACTTGGTAGCGTCTCA |                                      |
| S3630     | CTTCTACTCTTGACACTGAATACTAC    | ARS-proximal probe                   |
| O3970     | TCTACTGGAACCATATTCACGGA       |                                      |
| S2360     | TTATCTACCAAACGGTGACTG         | Telomere proximal probe for URA3-PAL |
| O2600     | GTTTCAACCTCCTTTGGAAC          |                                      |
| URA3-rt5  | GAACGTGCTGCTACTCATC           | RT-qPCR at URA3-PAL                  |
| URA3-rt3  | ACTCCAGTAATTCCTTGGTG          |                                      |
| HIS4-rt5  | GTTGTTGTGGAAGAGAACGG          | RT-qPCR at HIS4-PAL                  |
| HIS4-rt3R | TTGGTCGACA ACTAGGGTGG         |                                      |
| ACT1-rt5  | AACCGCTGCTCAATCTTC            | RT-qPCR at ACT1                      |
| ACT1-rt3R | CAATACCGGCAGATTCCAA           |                                      |
